# Supplementary material for: Rapid lateral flow test for Mycobacterium tuberculosis complex and non-tuberculous mycobacteria differentiation
Source: Springer Nature journal article supplement (doi:10.1007/s00253-024-13293-1), 2024-09-02
Supplement: MOESM1 [file 253_2024_13293_MOESM1_ESM.pdf]

## Supplementary Information

### Rapid lateral flow test for *Mycobacterium tuberculosis* complex and non-tuberculous mycobacteria differentiation

Ponrut Phunpae<sup>1\*</sup>, Weeraya Thongkum<sup>2, 3\*</sup>, Wutthichai Panyasit<sup>4</sup>, Witida Laopajon<sup>2, 5</sup>, Nuchjira Takheaw<sup>2, 5</sup>, Supansa Pata<sup>2, 5</sup>, Umpa Yasamut<sup>2, 3</sup>, Watchara Kasinrer<sup>2, 5#</sup>, Chatchai Tayapiwatana<sup>2, 3#</sup>

1. Division of Clinical Microbiology, Department of Medical Technology, Faculty of Associated Medical Sciences, Chiang Mai University, Chiang Mai 50200, Thailand
2. Division of Clinical Immunology, Department of Medical Technology, Faculty of Associated Medical Sciences, Chiang Mai University, Chiang Mai 50200, Thailand
3. Center of Innovative Immunodiagnostic Development, Department of Medical Technology, Faculty of Associated Medical Sciences, Chiang Mai University, Chiang Mai 50200, Thailand
4. Office of Disease Prevention and Control Region 1, Chiang Mai 50100, Thailand
5. Biomedical Technology Research Center, National Center for Genetic Engineering and Biotechnology, National Science and Technology Development Agency at the Faculty of Associated Medical Sciences, Chiang Mai University, Chiang Mai 50200, Thailand

\* Ponrut Phunpae and Weeraya Thongkum contributed equally to this work.

#### #Corresponding authors:

Watchara Kasinrer.

Division of Clinical Immunology, Department of Medical Technology, Faculty of Associated Medical Sciences, Chiang Mai University, Chiang Mai 50200, Thailand

Telephone: +6653935070

E-mail: Watchara.k@cmu.ac.th;

Chatchai Tayapiwatana.

Division of Clinical Immunology, Department of Medical Technology, Faculty of Associated Medical Sciences, Chiang Mai University, Chiang Mai 50200, Thailand

Telephone: +66818845141

E-mail: asimi002@hotmail.com

```

P9WQP1|A85B_MYCTU   MTDVSRKIR-AWGRRLMIGTAAAVVLPGLVGLAGGAATAGAFSRPGLPVEYLQVPSPSMG 59
P0C2T2|A85B_MYCBO   MTDVSRKIR-AWGRRLMIGTAAAVVLPGLVGLAGGAATAGAFSRPGLPVEYLQVPSPSMG 59
Q49575|A85B_MYCIA    MTDLSEKVR-AWGRRLVVGAAAAATLPGGLIGIAGGAATANAFSRPGLPVEYLQVPSAGMG 59
A1KJU9|A85B_MYCBP    MTDVSRKIR-AWGRRLMIGTAAAVVLPGLVGLAGGAATAGAFSRPGLPVEYLQVPSPSMG 59
P21160|A85B_MYCKA     MTDVSGKIR-AWGRRLLVGAAAAAALPGLVGLAGGAATAGAFSRPGLPVEYLQVPSAAMG 59
Q06947|A85B_MYCAV    MTDLSEKVR-AWGRRLLVGAAAAAVTLPGLIGLAGGAATANAFSRPGLPVEYLQVPSAGMG 59
B1MMV2|B1MMV2_MYCA9 -MEFLQKMRGATARLAAVA AVAAAILPGLIGVTGGSATAGAFSRPGLPVEYLQVPSAMG 59
      :.  *:* * . *   :.:.**, *****:;:*:* * .***** ,**

P9WQP1|A85B_MYCTU   RDIKVQFQSGGNNSPAVYLLDGLRAQDDYNGWDINTPAFEWYYQSGLSIVMPVGGQSSFY 119
P0C2T2|A85B_MYCBO   RDIKVQFQSGGNNSPAVYLLDGLRAQDDYNGWDINTPAFEWYYQSGLSIVMPVGGQSSFY 119
Q49575|A85B_MYCIA    RDIKVQFQSGGNGSPAVYLLDGLRAQDDYNGWDINTPAFEWYYQSGLSIVMPVGGQSSFY 119
A1KJU9|A85B_MYCBP    RDIKVQFQSGGNNSPAVYLLDGLRAQDDYNGWDINTPAFEWYYQSGLSIVMPVGGQSSFY 119
P21160|A85B_MYCKA     RSIKVQFQSGGDNSPAVYLLDGLRAQDDYNGWDINTPAFEWYYQSGLSIVMPVGGQSSFY 119
Q06947|A85B_MYCAV    RDIKVQFQSGGNGSPAVYLLDGLRAQDDYNGWDINTPAFEWYYQSGLSIVMPVGGQSSFY 119
B1MMV2|B1MMV2_MYCA9 RDIVVEFQPGGP--HAVYLLDQQRAREDYNGWDIETAFEDYYQSGISVMPVGGQSSNY 117
      *,* *:* **   ***** *;:*****;* *** *****:;:***** *

P9WQP1|A85B_MYCTU   SDWYSPACGKAGCQTYKWETFLTSELPQWLSANRAVKPTGSAAGLSMAGSSAMILAAYH 179
P0C2T2|A85B_MYCBO   SDWYSPACGKAGCQTYKWETFLTSELPQWLSANRAVKPTGSAAGLSMAGSSAMILAAYH 179
Q49575|A85B_MYCIA    ADWYQPACGKAGCSTYKWETFLTSELPQYLASNKGVKSTGSAAVGISMSGSSAMILAVNH 179
A1KJU9|A85B_MYCBP    SDWYSPACGKAGCQTYKWETFLTSELPQWLSANRAVKPTGSAAGLSMAGSSAMILAAYH 179
P21160|A85B_MYCKA     SDWYSPACGKAGCTTYKWETFLTSELPQWLSANRSVKPTGSAAVGISMAGSSALILSVYH 179
Q06947|A85B_MYCAV    ADWYQPACGKAGCSTYKWETFLTSELPQYLASNKGVKRTGNAAVGISMSGSSAMILAVNH 179
B1MMV2|B1MMV2_MYCA9 TDWYNPAKGDGVWYTYKWETFLTTELPQWLGVNKGISPAANAVVGLSMAGPSALT LAIYH 177
      :***,** ** * *****:;:***,;*, *;:, ,...,:*:*:* **; *; *

P9WQP1|A85B_MYCTU   PQQFIYAGSLSALLDPSQGMGPSLIGLAMGDAGGYKAADMWGPSSDPAWERNDPTQQIPK 239
P0C2T2|A85B_MYCBO   PQQFIYAGSLSALLDPSQGMGPSLIGLAMGDAGGYKAADMWGPSSDPAWERNDPTQQIPK 239
Q49575|A85B_MYCIA    PNQFVYAGSLSALLDPSQGMGPSLIGLAMGDAGGYKADAMWGPSSDPAWQRNDPQLIPA 239
A1KJU9|A85B_MYCBP    PQQFIYAGSLSALLDPSQGMGPSLIGLAMGDAGGYKAADMWGPSSDPAWERNDPTQQIPK 239
P21160|A85B_MYCKA     PQQFIYAGSLSALLDPSQGMGPSLIGLAMGDAGGYKASDMWGPSSDPAWQRNDPQLHIPE 239
Q06947|A85B_MYCAV    PDQFIYAGSLSALLDPSQGMGPSLIGLAMGDAGGYKADAMWGPSSDPAWQRNDPQLHIPE 239
B1MMV2|B1MMV2_MYCA9 PQQFVYAGALSAPLHPSDQK--WQIRVAMSADAGGFNADDMWGPSSDPAWARNDPFLHIDQ 235
      *;*:***:*** :,*;   * ;*,*****;* ***** ***** :*

P9WQP1|A85B_MYCTU   LVANNTRLWVYCGNGTPNELGGAN-----IPAEFLENFVRSSNLKFQDAYNAAGGHNAVF 294
P0C2T2|A85B_MYCBO   LVANNTRLWVYCGNGTPNELGGAN-----IPAEFLENFVRSSNLKFQDAYNAAGGHNAVF 294
Q49575|A85B_MYCIA    LVGNTRLWVYCGNGTPSELGGAN-----MPAEFLENFVRSSNLKFQDAYNAAGGHNAVF 294
A1KJU9|A85B_MYCBP    LVANNTRLWVYCGNGTPNELGGAN-----IPAEFLENFVRSSNLKFQDAYNAAGGHNAVF 294
P21160|A85B_MYCKA     LVANNTRLWIYCGNGTPSELGGAN-----VPAEFLENFVRSSNLKFQDAYNAAGGHNAVF 294
Q06947|A85B_MYCAV    LVGHNTRLWLYCGNGTPSELGGAN-----MPAEFLENFVRSSNLKFQDAYNAGAGGHNAVF 294
B1MMV2|B1MMV2_MYCA9 LIANNTRLWIYCGSGDATDLDKDRNGLEVISGGVIEGQVIDSDKKFAEAYSAGGANAHF 295
      :;:*****:***,* .;*, .   ; , .;*, * .;: ** :;*,*** ** *

P9WQP1|A85B_MYCTU   NFPPNGTHSWEYWGAQLNAMKGDLQSSLGAG----- 325
P0C2T2|A85B_MYCBO   NFPPNGTHSWEYWGAQLNAMKGDLQSSLGAG----- 325
Q49575|A85B_MYCIA    NFNANGTHSWEYWGAQLNAMKPDQLSALGASSGGGG 330
A1KJU9|A85B_MYCBP    NFPPNGTHSWEYWGAQLNAMKGDLQSSLGAG----- 325
P21160|A85B_MYCKA     NLDANGTHSWEYWGAQLNAMKGDLQASLGAR----- 325
Q06947|A85B_MYCAV    NFNANGTHSWEYWGAQLNAMKPDQLGTLGASPGGGG 330
B1MMV2|B1MMV2_MYCA9 EFPKGGIHNWYWGQNQLRAMKADLVGYLTKEPGTAAV 331
      :; ,* *,* *** **,* ** , *

```

## Supplementary Figure S1

### Alignment of MTB and NTM Ag85 protein sequences.

A Clustal Omega multiple sequence alignment [citation] of Ag85 protein sequences from various *Mycobacterium* strains is shown. The MTB strains include P9WQP1 (*M. tuberculosis*), P0C2T2 (*M. bovis* ATCC), and A1KJU9 (*M. bovis* BCG). The NTM strains include Q49575 (*M. intracellulare*), P21160 (*M. kansasii*), Q06947 (*M. avium*), and B1MMV2 (*M. abscessus*). The alignment highlights a unique amino acid sequence (TQQIPK) at positions 234-239 (red underline) present in the MTB strains but absent in the NTM strains.

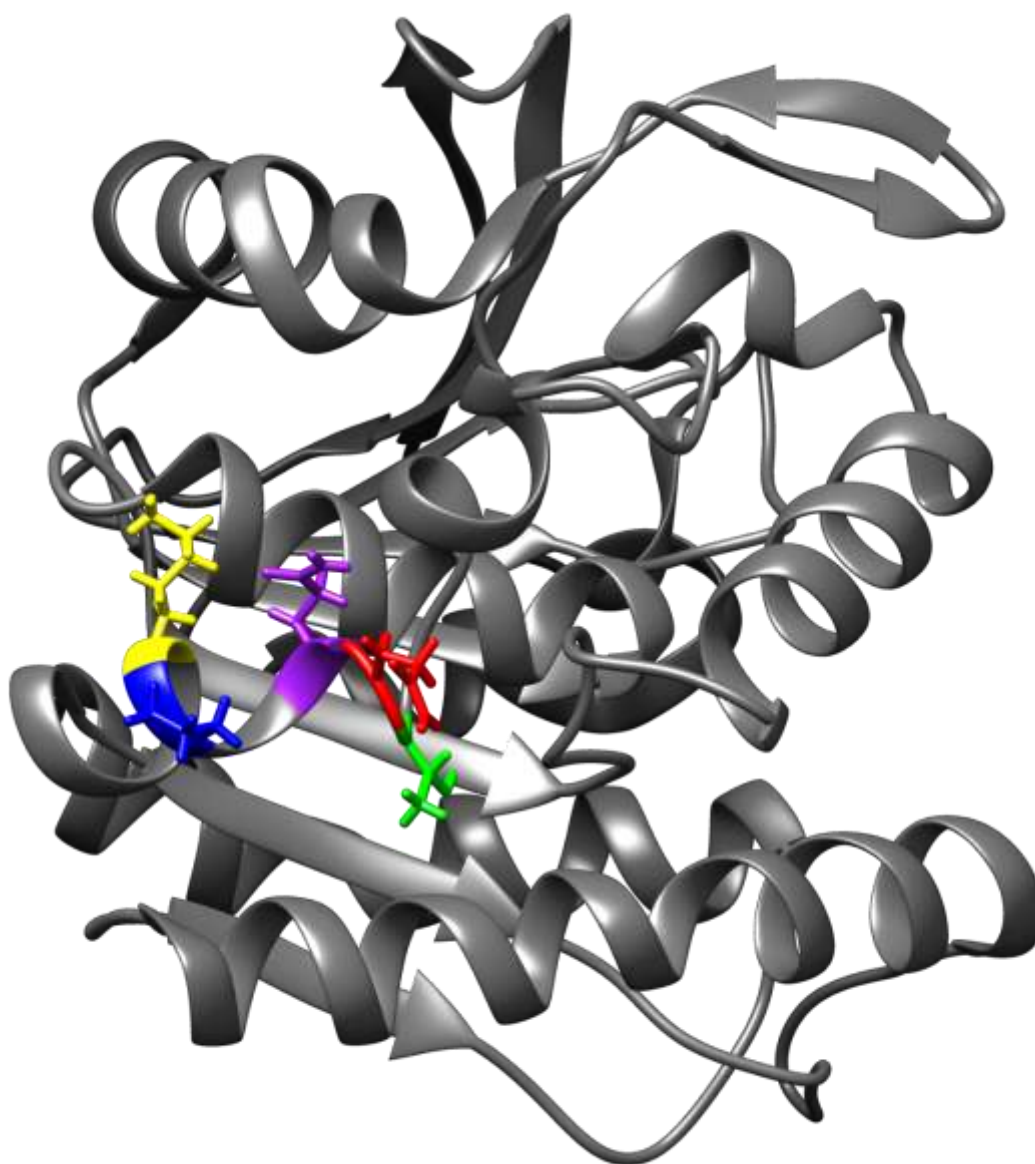

### Supplementary Figure S2

#### Prediction of MTB-Ag85 (PDB 1F0N) epitope by BCEP.

A surface-accessible epitope including T<sup>234</sup> (green), Q<sup>235</sup> (red), Q<sup>236</sup> (purple), P<sup>238</sup> (blue), and K<sup>239</sup> (yellow) is depicted. The conserved I<sup>236</sup> was buried within the structure.
